# Supplementary material for: Taipei's Use of a Multi-Channel Mass Risk Communication Program to Rapidly Reverse an Epidemic of Highly Communicable Disease
Source: PubMed Central journal article supplement (PMC2776508; doi:10.1371/journal.pone.0007962), 2009-11-23
Supplement: pone.0007962.s001.pdf [file pone.0007962.s001.pdf]

# 九十六年臺北區學生結膜炎(紅眼症)監測問卷

問卷填寫者(家長): \_\_\_\_\_ 填寫日期: \_\_\_\_月\_\_\_\_日

親愛的家長您好:

有鑒於結膜炎(紅眼症)在全國各地引起大流行,且造成家長們的恐慌,因此臺北市政府衛生局特製此問卷以了解紅眼症相關資訊。此問卷將作為防疫決策之參考,不會將您隱私的資料洩漏出去,敬請放心填寫。臺北市政府衛生局感謝您的配合與協助,並敬祝您闔家平安,順心!

臺北市政府衛生局 敬啟

## 一、學生(個人)基本資料

- 姓名: \_\_\_\_\_ 班級: \_\_\_\_年\_\_班 性別: 1. 男 2. 女
- 出生日期: 民國 \_\_\_\_年\_\_月\_\_日 年齡: \_\_\_\_歲
- 出生地: 國內 \_\_\_\_縣/市\_\_\_\_鄉鎮市區 國外 \_\_\_\_\_
- 現居地址: \_\_\_\_縣/市\_\_\_\_鄉鎮市\_\_\_\_區\_\_\_\_里/村\_\_\_\_路街\_\_\_\_巷\_\_\_\_弄
- 是否已就醫 是, (1) \_\_\_\_\_醫院; (2) \_\_\_\_\_診所; (3) \_\_\_\_\_校護 (4) 其他 \_\_\_\_\_;  
否
- 發病前是否因其他眼疾去過眼科診所?  (0) 無  (1) 有  (9) 不知

## 二、流行性結膜炎流行病學資料

- 學生同住的家人中, 是否有人得紅眼症, 共 \_\_\_\_\_ 位患者, 若有請填下表:

| 發病學生與家人<br>(以發病次序填寫) | 與學生之<br>稱謂 | 年齡 | 發病<br>首日<br>(月/<br>日) | 發病<br>結束<br>日<br>(月/<br>日) | 何處感染 |    |    |    |
|----------------------|------------|----|-----------------------|----------------------------|------|----|----|----|
|                      |            |    |                       |                            | 同事   | 同學 | 家人 | 未知 |
| 學生本人                 |            |    |                       |                            |      |    |    |    |
| 家人 1.                |            |    |                       |                            |      |    |    |    |
| 家人 2.                |            |    |                       |                            |      |    |    |    |
| 家人 3.                |            |    |                       |                            |      |    |    |    |
| 家人 4.                |            |    |                       |                            |      |    |    |    |
| 家人 5.                |            |    |                       |                            |      |    |    |    |

- 請問您貴子弟若有紅眼症, 在發病一週內是否接觸過類似「紅眼症」症狀的個案(未發病者免答)  
 (0) 否  
 (1) 是, 關係是:  家人 \_\_\_\_\_;  朋友;  同學;  鄰居、其他 \_\_\_\_\_; 共 \_\_\_\_\_ 人  
 (9) 不清楚  
(a) 學生若有紅眼症, 是否為班上第一位感染者?  (0) 否  (1) 是  (9) 不清楚  
(b) 學生若有紅眼症, 是否為家中第一位感染者?  (0) 否  (1) 是  (9) 不清楚  
(c) 學生若有紅眼症, 除了班上、家中以外在其他社區活動地(如圖書館、電影院、KTV、游泳池), 個案本身是否有見過紅眼症病例?  (0) 否  (1) 是  (9) 不清楚

3. 請問您貴子弟在紅眼症發病後，有無請假？
- (0)無；
- (1)有（請假\_\_\_天）；
- (9)不清楚
4. 請問您是從何處得知紅眼症須要在家休息，盡量不要上學的資訊（可複選）： (1)手機簡訊  (2)電視報導  (3)台北市市長10月12日記者會  (4)報紙  (5)收音機廣播  (6)學校之疫情宣導  (7)台北市衛生局與教育局所發布之「給家長的一封信」  (8)家長自行決定  (9)身體不適因而無法上學  (10)其他，請註明：\_\_\_\_\_
5. 請問您貴子弟請假而未上學的決定是基於下列一項資訊(可複選)（未發病者免答）： (1)手機簡訊  (2)電視報導  (3)台北市市長10月12日記者會  (4)報紙  (5)收音機廣播  (6)學校之疫情宣導  (7)台北市衛生局與教育局所發布之「給家長的一封信」  (8)家長自行決定  (9)身體不適因而無法上學  (10)其他，請註明：\_\_\_\_\_
6. 請問您貴子弟發病後在家中休息時，是否有注意居家環境消毒（未發病者免答）？
- (0)無；
- (1)有；
- (9)不清楚
7. 請問您貴子弟發病後在家中休息時，是否有注意與家人做基本的隔離（例如：不共用毛巾、洗臉盆…）（未發病者免答）？
- (0)無；
- (1)有；
- (9)不清楚
8. 上述在家消毒知識資訊來源(可複選)： (1)手機簡訊  (2)電視報導  (3)台北市市長10月12日記者會  (4)報紙  (5)收音機廣播  (6)學校之疫情宣導  (7)台北市衛生局與教育局所發布之「給家長的一封信」  (8)家長自行決定  (9)平常學校的腸病毒教育  (10)其他，請註明：\_\_\_\_\_
9. 上述在家隔離知識資訊來源(可複選)： (1)手機簡訊  (2)電視報導  (3)台北市市長10月12日記者會  (4)報紙  (5)收音機廣播  (6)學校之疫情宣導  (7)台北市衛生局與教育局所發布之「給家長的一封信」  (8)家長自行決定  (9)平常學校的腸病毒教育  (10)其他，請註明：\_\_\_\_\_
10. 請問您貴子弟是否參與下列學校活動？(可複選)
- 否；
- (1)是： (a)電腦課  (b)音樂課  (c)球類活動  (d)游泳  (e)其他運動，請註明：\_\_\_\_\_  (f)家政課  (g)實習工廠  (h)工藝課  (i)其他專科教室，請註明：\_\_\_\_\_

11. 請問您貴子弟是否有參與**課外/課後活動**? (可複選)
- (0)否；
- 是： (1)安親班  (2)補習班  (3)校隊  (4)社團  (5)其他\_\_\_\_\_
12. 請問您貴子弟班上是否曾有**相同症狀**的個案出現
- (0)否；
- (1)是：共\_\_\_\_\_人；
- (2)不清楚
13. 請問您貴子弟在發病前2週是否到過居住外的其他縣市見過紅眼症個案**(未發病者免答)**
- (0)否；
- (1)是：\_\_\_\_\_縣市，如有見過，第幾\_\_\_\_天發病
14. 請問您貴子弟最近一週內是否搭乘過**大眾運輸工具**
- (0)否；
- 是： (1)公車  (2)捷運  (3)火車  (4)高鐵  (5)長途客運  (6)計程車  (7)飛機  (8)其他\_\_\_\_\_
15. 請問您貴子弟平常是否有**正確洗手**的習慣
- (0)否；
- 是： (1)會洗手，但不是每次  (2)會定時洗手，但沒有正確洗手  (3)都會按照「濕搓沖捧擦」的步驟正確洗手
16. 請問您貴子弟是否喜歡到處觸摸物品
- (0)否；
- 是： (1)偶爾  (2)常常  (3)總是
17. 請問您貴子弟是否到處觸摸物品後會洗手
- (0)否；
- 是： (1)偶爾  (2)常常  (3)總是
18. 請問您貴子弟是否在觸摸完物品後會去揉眼睛
- (0)否；
- 是： (1)偶爾  (2)常常  (3)總是
19. 請問您老師是否定期檢查學生攜帶手帕與衛生紙
- (0)否；
- (1)是；
- (9)不清楚
20. 請問您貴子弟過去是否曾有下列疾病? (可複選)： (0)均無  (1)結膜炎 (非此次紅眼症)  (2)角膜炎  (3)砂眼  (4)白內障  (5)弱視  (6)乾眼症  (7)視網膜受損

(8) 其他\_\_\_\_\_

21. 請問您貴子弟此次發病症狀有(可複選)(未發病者免答):  (1) 結膜充血  (2) 眼睛刺痛  (3) 分泌物變多  (4) 怕光  (5) 灼熱  (6) 容易流眼淚  (7) 異物感  (8) 看不清楚  (9) 局部淋巴腫大  (10) 其他\_\_\_\_\_。

22. 請問貴家長是否有收到此次防疫手機簡訊?

(0) 否;  (1) 是

23. 請問您是否滿意此次臺北市政府以手機傳遞防疫簡訊資料?

(0) 非常滿意;  (1) 滿意;  (2) 普通;  (3) 不滿意;  (4) 非常不滿意
